# Supplementary material for: Inductively coupled plasma optical emission spectroscopy as a tool for evaluating lateral flow assays
Source: Royal Society of Chemistry journal article supplement (doi:10.1039/d1ay00236h), 2021-01-01

# Supplemental Information for Inductively Coupled Plasma Optical Emission Spectroscopy as a Tool for Evaluating Lateral Flow Assays

Jenna M. DeSousa<sup>a,1</sup>, Micaella Z. Jorge<sup>a,1</sup>, Hayley B. Lindsay<sup>b,c</sup>, Frederick R. Haselton<sup>a,b</sup>, David W. Wright<sup>a\*</sup>, Thomas F. Scherr<sup>a\*</sup>

<sup>1</sup>these authors contributed equally

\*author to whom correspondence should be directed ([thomas.f.scherr@vanderbilt.edu](mailto:thomas.f.scherr@vanderbilt.edu))

\*author to whom correspondence should be directed ([david.w.wright@vanderbilt.edu](mailto:david.w.wright@vanderbilt.edu))

## Affiliations:

<sup>a</sup> Department of Chemistry, Vanderbilt University, Nashville, TN, USA

<sup>b</sup> Department of Biomedical Engineering, Vanderbilt University, Nashville, TN, USA

---

<sup>c</sup> Present address: Department of Biomedical Engineering, University of Texas at Austin, Austin, TX, USA

**Table S1:** ICP-OES operating conditions.

| OPTIMA 7000 DV OPERATING CONDITIONS |                |
|-------------------------------------|----------------|
| Spray chamber                       | Cyclonic       |
| Nebulizer                           | GemCone        |
| Injector                            | 2.0 mm Alumina |
| Plasma gas                          | 15 L           |
| Auxillary gas                       | 0.2 L          |
| Nebulizer gas                       | 0.60 L         |
| RF Power                            | 1300 W         |
| Plasma view                         | Axial          |
| Read delay                          | 30 s           |
| Peristaltic pump flow rate          | 1.50 mL/min    |
| Replicates                          | 3              |

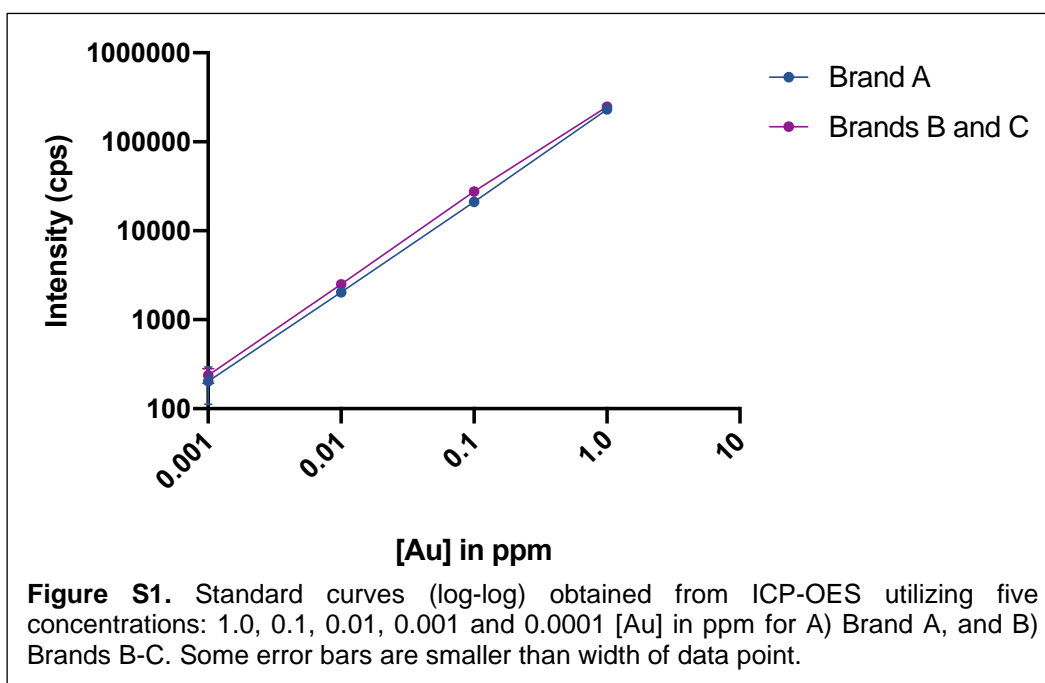

A.

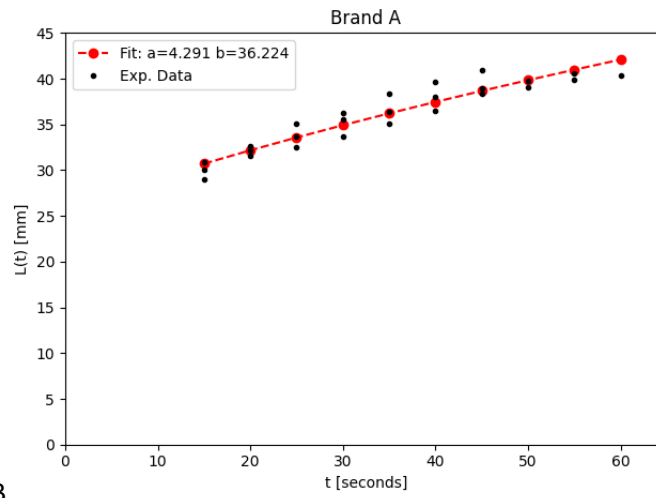

B.

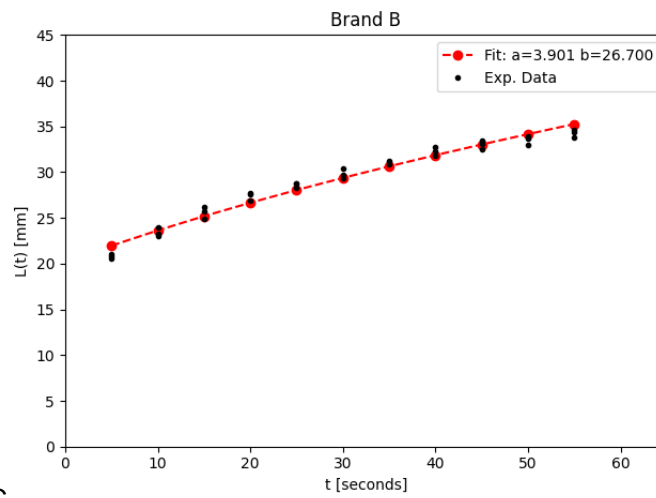

C.

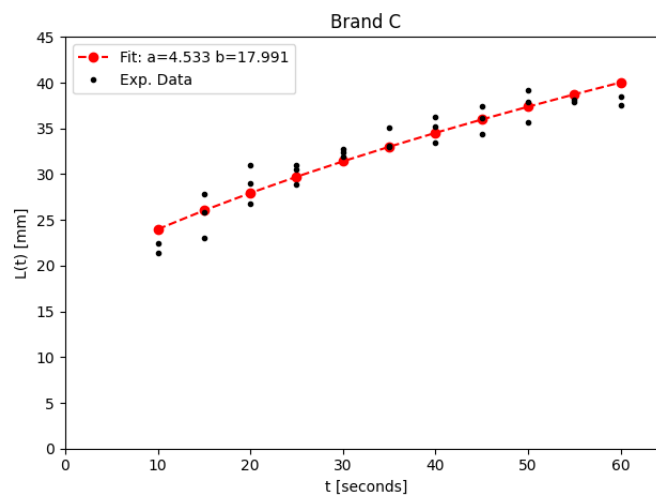

**Figure S2.** The length the fluid front traveled with respect to time for A) Brand A; B) Brand B; and C) Brand C.

A.

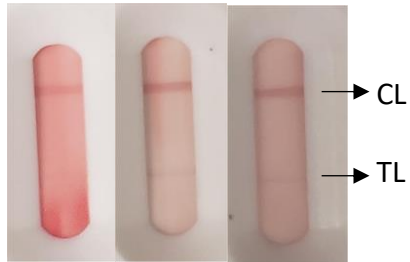

B.

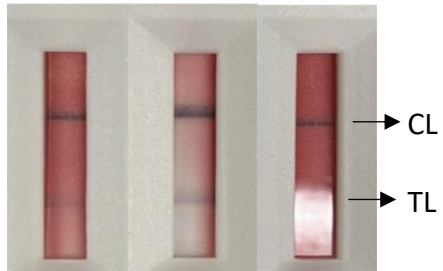

C.

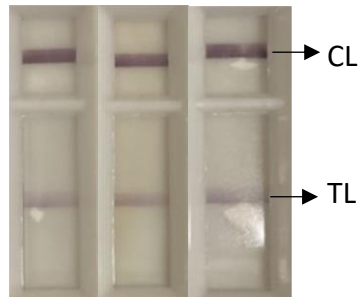

**Figure S3.** Representative pictures of LFAs at 100 p/μL. A) Brand A; B) Brand B; and C) Brand C

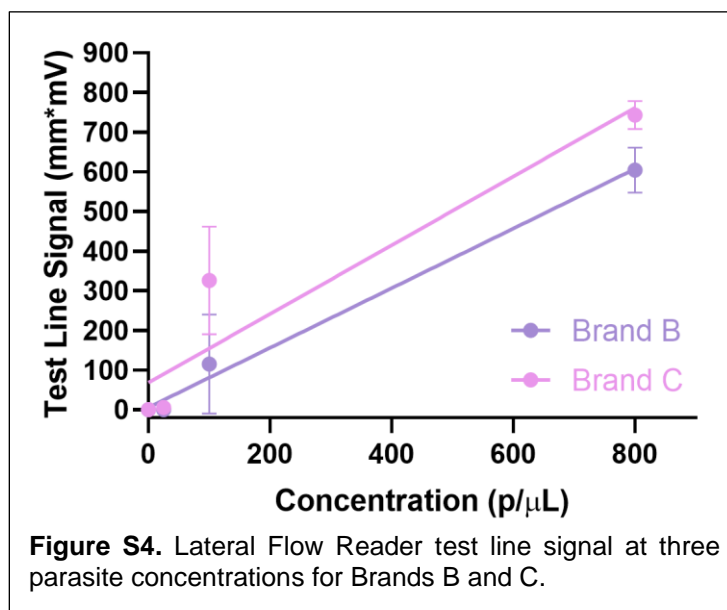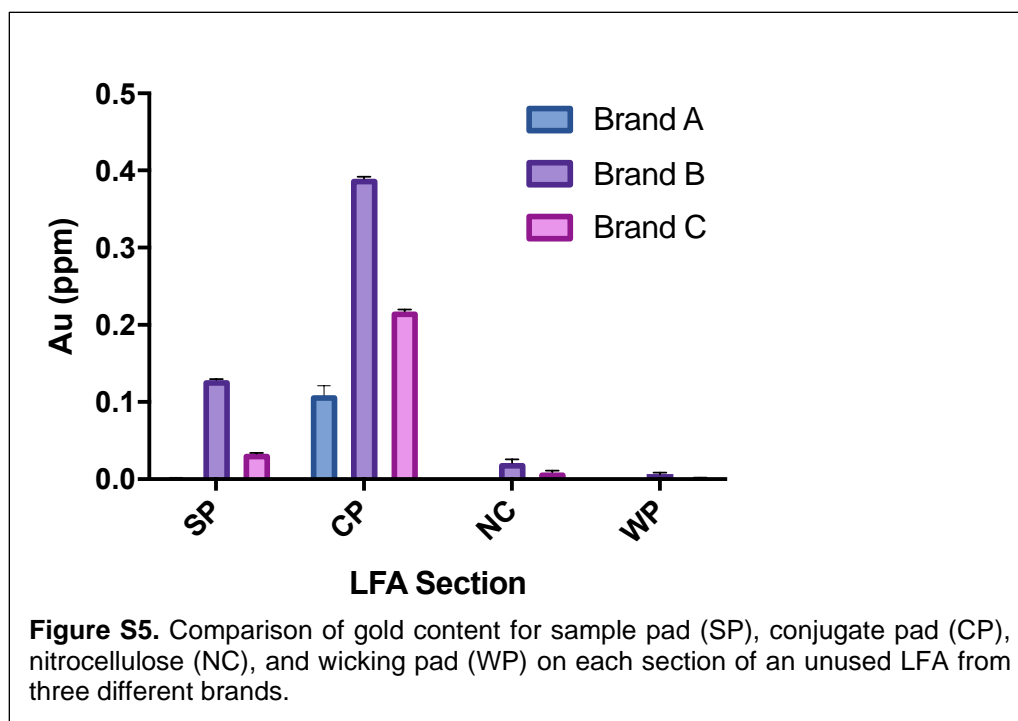

Supplement: d1ay00236h1.pdf [file d1ay00236h1.pdf]
